# Supplementary material for: Monitoring of Anticoagulant Activity of Dabigatran and Rivaroxaban in the Presence of Heparins
Source: J Clin Med. 2022 Apr 16;11(8):2236. doi: 10.3390/jcm11082236 (PMC9028841; doi:10.3390/jcm11082236)
Supplement: Supplementary file 1 [file jcm-11-02236-s001.zip › jcm-1627624-supplementary.pdf]

## Supplementary Materials

**Table S1.** Characteristics of healthy volunteers.

|                                         | Values in Healthy Patients |
|-----------------------------------------|----------------------------|
| Sex (M/F)                               | 4/4                        |
| Age (years)                             | 31 ± 6                     |
| BMI (kg/m <sup>2</sup> )                | 23.4 ± 2.0                 |
| White blood cells (×10 <sup>3</sup> µL) | 4.7 ± 1.3                  |
| Red blood cells (×10 <sup>6</sup> µL)   | 4.9 ± 0.2                  |
| Hemoglobin (g/dL)                       | 14.6 ± 1.0                 |
| Hematocrit (%)                          | 43.0 ± 2.5                 |
| Platelet (×10 <sup>3</sup> µL)          | 238.1 ± 48.8               |
| Creatinine (mg/dL)                      | 0.85 ± 0.15                |
| Total cholesterol (mg/dL)               | 172.9 ± 35.4               |
| Triglycerides (mg/dL)                   | 71.8 ± 20.6                |
| HDL (mg/dL)                             | 53.7 ± 10.4                |
| LDL (mg/dL)                             | 106.4 ± 32.0               |
| Total bilirubin (mg/dL)                 | 0.82 ± 0.31                |
| ALT (U/L)                               | 28.4 ± 26.2                |
| CRP (mg/L)                              | 1.5 ± 2.6                  |
| Blood glucose level (mg/dL)             | 93.9 ± 5.8                 |
| SBP (mmHg)                              | 120.1 ± 4.1                |
| DBP (mmHg)                              | 77.0 ± 7.1                 |

Data are shown as mean ± S.D. ALT, alanine transaminase; BMI, body mass index; CRP, C-reactive protein; DBP, diastolic blood pressure; HDL, high-density lipoprotein; LDL, low-density lipoprotein; SBP, systolic blood pressure.

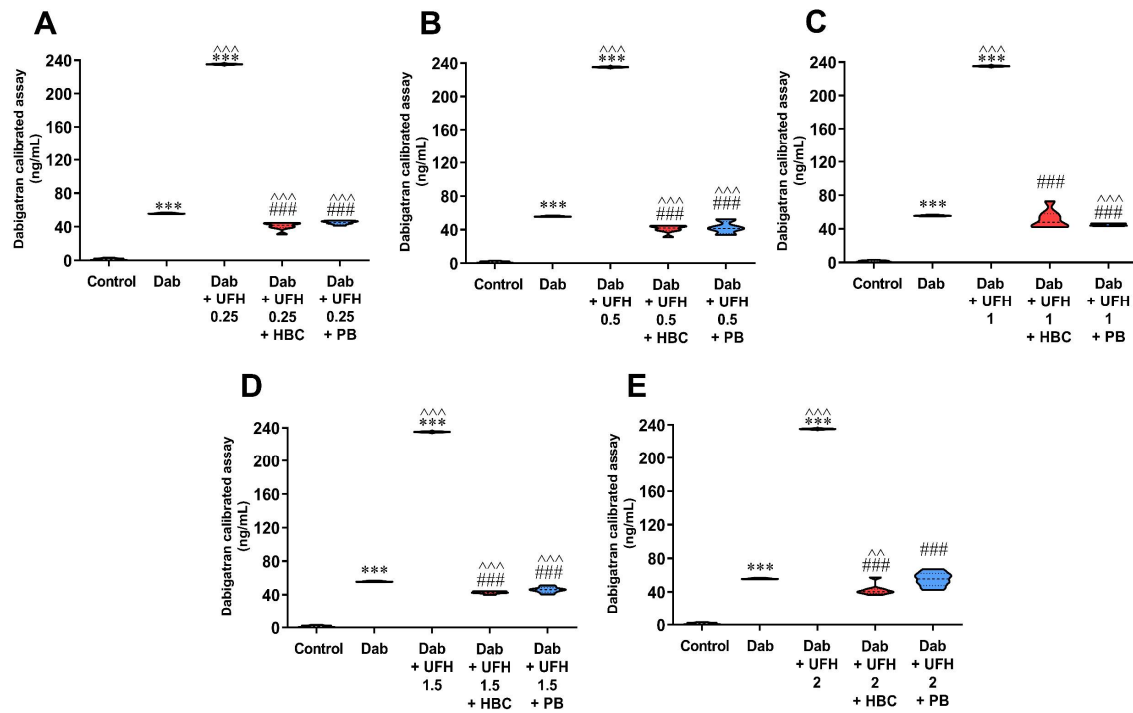

**Figure S1.** Inhibition of UFH at concentration 0.25 (A), 0.5 (B), 1 (C), 1.5 (D) and 2 U/mL (E) by HBC or polybrene at a concentration of 50 µg/mL during testing of dabigatran (50 ng/mL) anticoagulant activity by TT converted to ng/mL for dabigatran in human plasma. \*\*\*p < 0.001 vs control; ^^^p < 0.001 vs dabigatran; ###p < 0.001 vs dabigatran with UFH, Mann-Whitney test. Results are shown as violin plots with minimum and maximum values, and analyzed with GraphPad Prism 8 software. Dab, dabigatran; HBC, heparin-binding copolymer; PB, polybrene; UFH; unfractionated heparin.

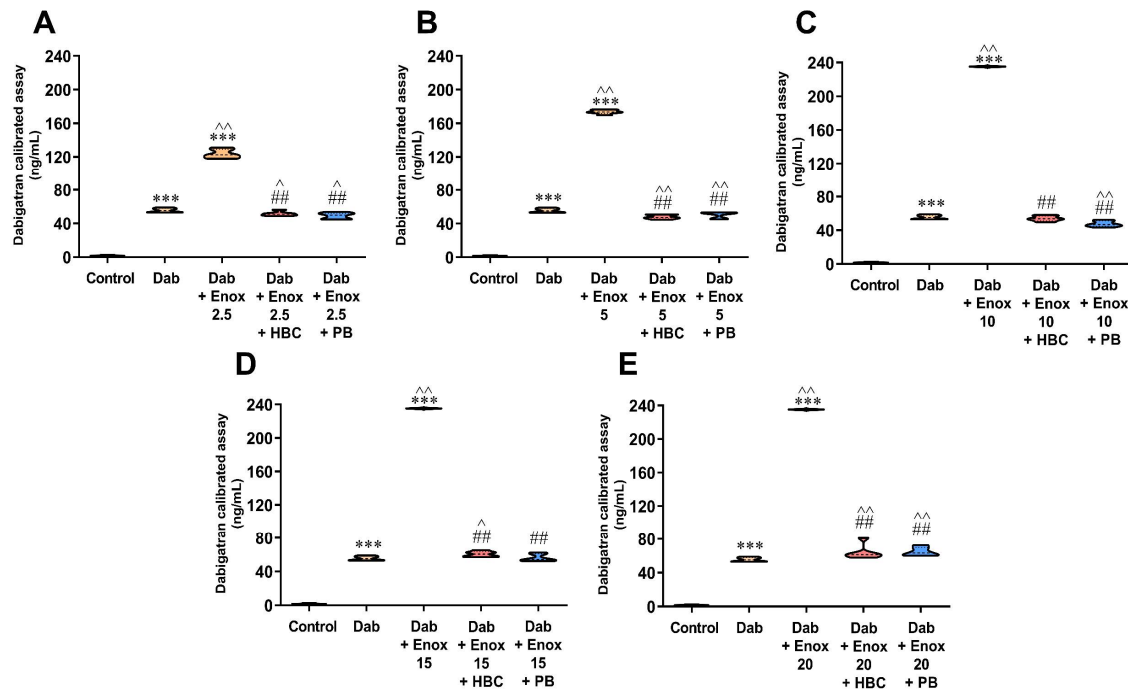

**Figure S2.** Inhibition of enoxaparin at a concentration of 2.5 (A), 5 (B), 10 (C), 15 (D) and 20 µg/mL (E) by HBC or polybrene at a concentration of 50 µg/mL during testing of dabigatran (50 ng/mL) anticoagulant activity by TT converted to ng/mL for dabigatran in human plasma. \*\*\* $p < 0.001$  vs control; ^ $p < 0.05$ , ^^ $p < 0.01$  vs dabigatran; ## $p < 0.01$  vs dabigatran with enoxaparin, Mann-Whitney test. Results are shown as violin plots with minimum and maximum values, and analyzed with GraphPad Prism 8 software. Dab, dabigatran; Enox, enoxaparin; HBC, heparin-binding copolymer; PB, polybrene.

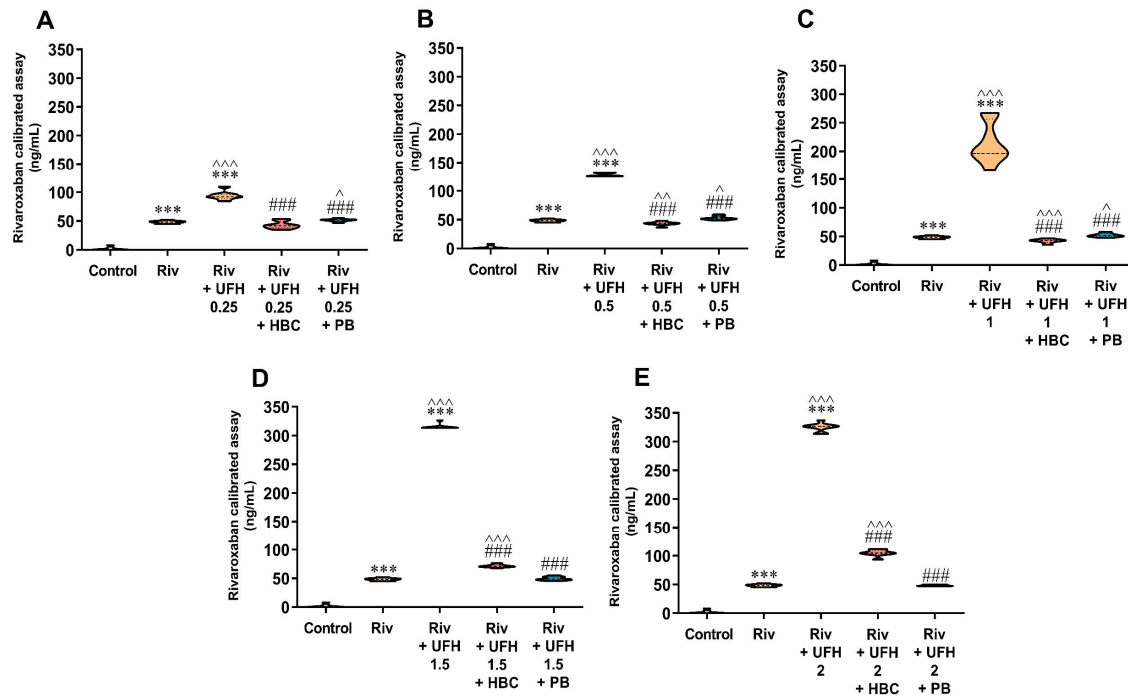

**Figure S3.** Inhibition of UFH at concentration 0.25 (A), 0.5 (B), 1 (C), 1.5 (D) and 2 U/mL (E) by HBC (10  $\mu$ g/mL) and polybrene (50  $\mu$ g/mL) during testing of rivaroxaban (50 ng/mL) anticoagulant activity converted to rivaroxaban calibrated anti-factor Xa assay in human plasma. \*\*\* $p < 0.001$  vs control; ^ $p < 0.05$ , ^^ $p < 0.01$ , ^^ $p < 0.001$  vs rivaroxaban; ### $p < 0.001$  vs rivaroxaban with UFH, Mann-Whitney test. Results are shown as violin plots with minimum and maximum values, and analyzed with GraphPad Prism 8 software. HBC, heparin-binding copolymer; PB, polybrene; Riv, rivaroxaban; UFH, unfractionated heparin.

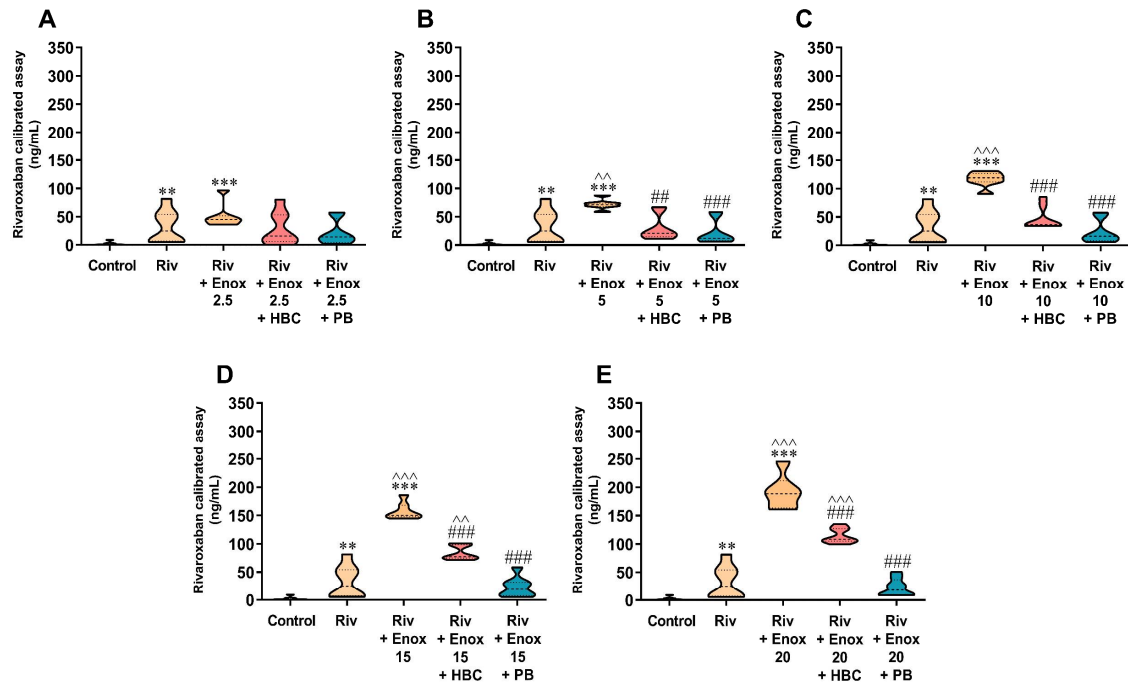

**Figure S4.** Inhibition of enoxaparin at concentration 2.5 (A), 5 (B), 10 (C), 15 (D) and 20 µg/mL (E) by HBC (10 µg/mL) and polybrene (50 µg/mL) during testing of rivaroxaban (50 ng/mL) anticoagulant activity converted to rivaroxaban calibrated anti-factor Xa assay in human plasma. \*\* $p < 0.01$ , \*\*\* $p < 0.001$  vs control; ^^ $p < 0.01$ , ^^ $p < 0.001$  vs rivaroxaban; ## $p < 0.01$ , ### $p < 0.001$  vs rivaroxaban with enoxaparin, Mann-Whitney test. Results are shown as violin plots with minimum and maximum values, and analyzed with GraphPad Prism 8 software. Enox, enoxaparin; HBC, heparin-binding copolymer; PB, polybrene; Riv, rivaroxaban.
